# Supplementary material for: Expression, Purification, and In Silico Characterization of Mycobacterium smegmatis Alternative Sigma Factor SigB
Source: Hindawi journal article supplement (doi:10.1155/2022/7475704), 2022-05-20

**Sup. fig. 1:** Ramachandran plots for the homology models of **a)** *M. smegmatis* SigA and **b)** *M. smegmatis* SigB

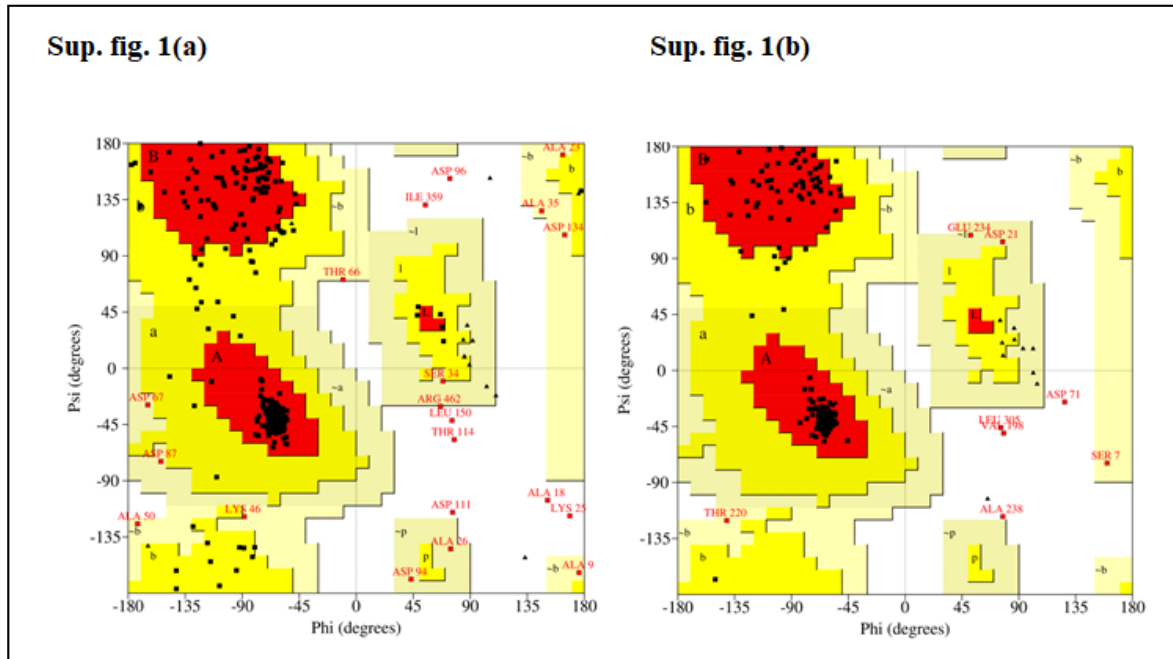

Supplement: f1 [file 7475704.f1.pdf]
